# Supplementary figures and images for: Discovery and assessment of conserved Pax6 target genes and enhancers
Source: HighWire-hosted journal article supplement (doi:10.1101/gr.124115.111), 2011-05-26

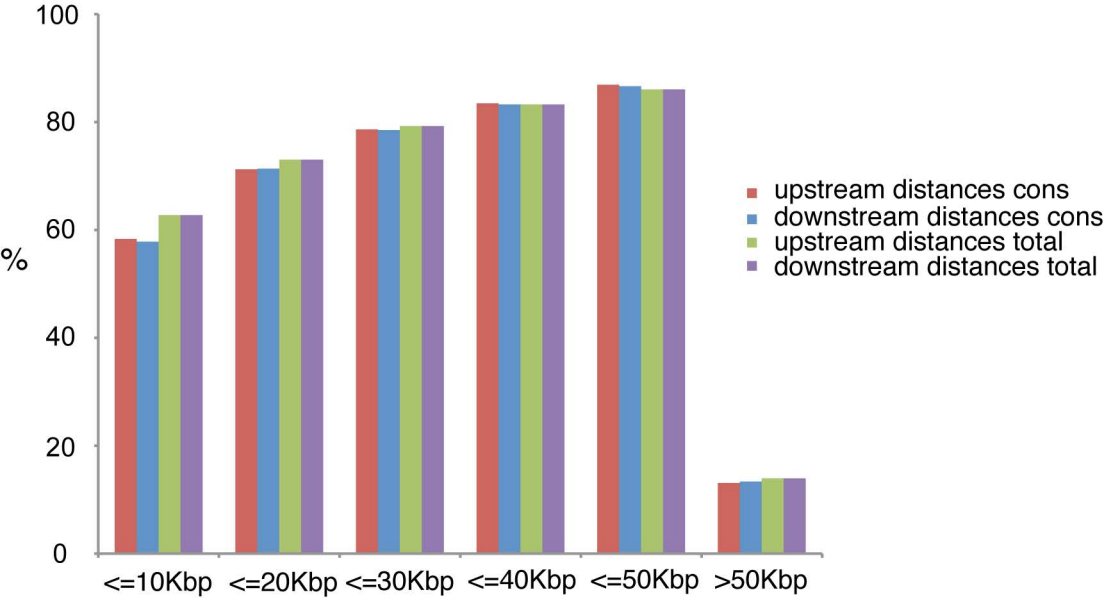

Supplement: Coutinho124115_FigS8.pdf [file Coutinho124115_FigS8.pdf]
